# Supplementary material for: In situ visualization of bacterial populations in coral tissues: pitfalls and solutions
Source: PeerJ. 2016 Sep 20;4:e2424. doi: 10.7717/peerj.2424 (PMC5036075; doi:10.7717/peerj.2424)
Supplement: Data S1 [file peerj-04-2424-s003.xlsx]

## Sheet: Sheet1
	Raw Data associatd with FISH based experimental work Wada et al 2016.
								Probes (Seq-Dye) *1
													1) EUB338-Cy3	1) Non-338-Cy5	1) EUB338-Cy3
	Experimental ID							1) EUB338-Cy3	1) Vib GV-Atto 647		1) Non-338-Cy3	1) Non-338-Cy5	+	+	+	1) Non probe
	Collected date	Sample state	Sample ID	Tissue state	experiment date		Cell state						2) Vib GV-Atto 647	2) Vib GV-Atto 647	2) Non-338-Cy5
	Sep. 2010	Disease	LD1H	Healthy	120903	1)	Bacterial aggregation	FSD	ND		ND					ND
							Spriocysts & Granular gland cells	FSD	FSD		FSD					ND
					120911	1)	Bacterial aggregation	FSD	ND		ND					ND
							Spriocysts & Granular gland cells	FSD	FSD		FSD					ND
			LD1D	Disease	120903	1)	Bacterial aggregation	FSD	ND		ND					ND
							Spriocysts & Granular gland cells	FSD	FSD		FSD					ND
					120911	1)	Bacterial aggregation	FSD	ND		ND					ND
							Spriocysts & Granular gland cells	FSD	FSD		FSD					ND
			LD2H	Healthy	120903	1)	Bacterial aggregation	FSD	ND		ND					ND
							Spriocysts & Granular gland cells	FSD	FSD		FSD					ND
			LD2D	Disease	120903	1)	Bacterial aggregation	FSD	ND		ND					ND
							Spriocysts & Granular gland cells	FSD	FSD		FSD					ND
	Jul 2011	Healthy	NNH1	Healthy	120903	1)	Bacterial aggregation	FSD	ND		ND					ND
							Spriocysts & Granular gland cells	FSD	FSD		FSD					ND
					120911	1)	Bacterial aggregation	FSD	ND		ND					ND
							Spriocysts & Granular gland cells	FSD	FSD		FSD					ND
			NNH2	Healthy	120903	1)	Bacterial aggregation	FSD	ND		ND					ND
							Spriocysts & Granular gland cells	FSD	FSD		FSD					ND
	Sep. 2010	Disease	CH2D1-D	Disease	120919	1)	Bacterial aggregation	FSD	ND		ND		FSD			ND
							Spriocysts & Granular gland cells	FSD	FSD		FSD		FSD			ND
						2)	Bacterial aggregation						ND
							Spriocysts & Granular gland cells						FSD
			CH1D3-D	Disease	120919	1)	Bacterial aggregation	FSD	ND		ND		FSD			ND
							Spriocysts & Granular gland cells	FSD	FSD		FSD		FSD			ND
						2)	Bacterial aggregation						ND
							Spriocysts & Granular gland cells						FSD
	Sep. 2010	Disease	CH3D1-D	Disease	120922	1)	Bacterial aggregation	FSD	ND		ND					ND
							Spriocysts & Granular gland cells	FSD	FSD		FSD					ND
					120926	1)	Bacterial aggregation		ND		ND	ND		ND	FSD	ND
							Spriocysts & Granular gland cells		FSD		FSD	FSD		FSD	FSD	ND
						2)	Bacterial aggregation							ND	ND
							Spriocysts & Granular gland cells							FSD	FSD
			ND: No Detected Florescent Signal, FSD: Florescent Signal Detected
			*1: All probes were checked and verified against cultured E.coli and Vibrio before undertaking exprimental work.
	FISH experiment including Blocking solution
								Probes (Seq-Dye) *1
								EUB338-Cy3			Non-338-Cy3		Non probe
	Collected date	Sample state	Sample ID	Tissue state	experiment date		Cell state	none	Blocking		none	Blocking	none
	Sep. 2010	Disease	CH3D1-D	Disease	121003		Bacterial aggregation	FSD	FSD		ND	ND	ND
							Spriocysts & Granular gland cells	FSD	FSD		FSD	FSD	ND
					121007		Bacterial aggregation	FSD	FSD		ND	ND	ND
							Spriocysts & Granular gland cells	FSD	FSD		FSD	FSD	ND
	Feb. 2012	Disease	Y1D9-H	Healthy	121112		Bacterial aggregation		FSD			ND	ND
							Spriocysts & Granular gland cells		FSD			FSD	ND
			Y1D9-D	Disease	121112		Bacterial aggregation		FSD			ND	ND
							Spriocysts & Granular gland cells		FSD			FSD	ND
			Y1H3	Disease	121112		Bacterial aggregation		FSD			ND	ND
							Spriocysts & Granular gland cells		FSD			FSD	ND
		Healthy	NN1H5	Healthy	121112		Bacterial aggregation		FSD			ND	ND
							Spriocysts & Granular gland cells		FSD			FSD	ND
			NN1H6	Healthy	121112		Bacterial aggregation		FSD			ND	ND
							Spriocysts & Granular gland cells		FSD			FSD	ND
